1 **Psychological status of medical students and interns in the wake of the armed conflict of**  
2 **April 2023 in Sudan. A cross-sectional study.**

3

4 **War in Sudan and mental health**

5

6 Salaheddin M. Abdulhamid<sup>1¶\*</sup>, Faris Kh. Almokdad<sup>2¶</sup>, Razan J. Q. Ahmed<sup>1</sup>, Rawah M. A. M.  
7 Elbashir<sup>3</sup>, Yousif Ali Ahmed Suleiman<sup>1</sup>, SudaMedReCollab group<sup>^</sup>

8

9 <sup>1</sup>Department of Internal Medicine, Faculty of Medicine, University of Science and Technology,  
10 Omdurman, Khartoum, Sudan.

11 <sup>2</sup>Department of Surgery, Faculty of Medicine, University of Science and Technology, Omdurman,  
12 Khartoum, Sudan.

13 <sup>3</sup>Faculty of Medicine, Ibn Sina University, Khartoum, Sudan.

14

15 \* Corresponding author

16 E-mail: SalaheddinAbdulhamid@gmail.com (SMA)

17

18 ¶ These authors contributed equally to this work.

19 ^Membership of the SudaMedReCollab group is provided in the Supporting Information

## 20 **Abstract**

21 The ongoing civil war in Sudan of April 2023 has erupted as two belligerent groups vie for the  
22 position of ruler in the country, resulting in severe detrimental effects throughout the population,  
23 from deaths to property losses to severe deterioration of the already strained infrastructures of the  
24 country, to the sheer psychological trauma from observing and suffering the ongoing dramatic  
25 events. A subgroup is the medical students and interns in Sudan, who suffered direct losses in  
26 every regard, from sheer psychological distress to deaths, with material losses and career  
27 disruptions. We believe this is a group that should be paid due attention. This study aims to  
28 determine whether certain elements can be viewed as correlates of the psychological disorders we  
29 expect to see prevalent and their prevalences.

30 An online cross-sectional study was undertaken using several sampling methods to reach as far as  
31 we possibly could under the circumstances, with a structured questionnaire containing items  
32 divided between demographics, what we perceive to be factors, and scales (PHQ-9, GAD-7, AIS-  
33 8, and ITQ). The Survey was conducted from September 11<sup>th</sup> to 30<sup>th</sup>, 2023, resulting in 7306  
34 responses, of which 665 were excluded. A sample of 6641 were included, of which 2370 (35.7%)  
35 were males and 4271 (64.3%) were females. We found prevalences of 33.7% for depression,  
36 22.4% for anxiety, 13.6% for PTSD, and 59.5% for Insomnia, correlating with several factors,  
37 noted to impact the psychological health of our sample. Our findings suggest the need for  
38 purposeful, directed interventions to mitigate the impact of this conflict, and all that may follow.

39

40

41

## 42 **Introduction**

43 Sudan is a huge country marred with poverty and conflict, usually at the peripheries, until the civil  
44 war started in Khartoum, the capital, over who's who in April of 2023 [1]. This has been a tragic  
45 turn of events and a deep cut to everyone, displacing approximately 9,052,822 persons according  
46 to the International Organization for Migration Displacement Tracking Matrix (IOM DTM) [2],  
47 the largest internal crisis at the time, including medical residents and medical graduates from  
48 Sudanese medical schools, which requires adaptive strategies from all stakeholders involved in the  
49 medical system and healthcare to mitigate and overcome the biopsychosocial consequences  
50 thereof.

51 The history of modern medical education in Sudan goes back to Kitchener School of Medicine  
52 established in 1924, currently, the School of Medicine at the University of Khartoum, and counts  
53 have risen to more than 72 schools of medicine spread across the country, with a diverse host of  
54 students who also practice as interns during and after their study, and a diversity of medical study  
55 programs [3]. This population of medical students comes from many ethnicities and backgrounds  
56 and go on to spread across the globe as practitioners of medicine in all specialties. This population  
57 is notably both vulnerable and is especially stressed at the best of times, a stress compounded in  
58 Sudan by several upheavals in recent years with deteriorating living standards that climaxed in  
59 protests regarding the price of bread despite the partial lifting of American sanctions, with an  
60 intermission involving the recent COVID-19 pandemic, and now, by an all-out war, yet this  
61 population remains poorly studied under these conditions [4].

62 Of the most common psychological conditions rife in healthcare workers are Depression, Anxiety,  
63 PTSD, and Insomnia due to the mental and emotional demands imposed by medical school

64 programs, and the costs associated, be they material or otherwise, and the sheer exposure to death  
65 and disease in a developing country.

66 We believe this to be an important subject to study scientifically to guide appropriate intervention  
67 in a well-targeted manner as close observers ourselves who have also survived the Syrian civil  
68 war, yet suffering all the more for it, and we set out with the obvious: war will result in  
69 psychological trauma [5], and the difficulties faced will likely result in Anxiety, Depression,  
70 PTSD, and Insomnia [6-17], among other insults, for quite a while [18]. We have set out to reach  
71 our colleagues to inquire about the matter. We found a good response from which we'd included  
72 6641 as the respondents that match the criteria.

73 We hypothesized that our population will be impacted by what we ourselves have noted to impact  
74 us, as well as what we have observed to impact others firsthand from our vantage points. Medical  
75 schools have suspended their role and are shut down at least partially and temporarily even as we  
76 were teaching assistants, leaving our medical students unable to complete their studies and  
77 exposing them to a myriad of risk factors for psychological trauma, also inherent to war.

78 The rationale is that understanding the psychological status of medical students during the current  
79 armed conflict in Sudan is crucial for addressing their mental health needs and for designing  
80 appropriate support systems in response to the current situation, as well as to others to follow.  
81 Previous research has highlighted the negative psychological consequences of armed conflicts on  
82 individuals overall [7, 16, 17, 19-22], but there is a dearth of studies focusing specifically on  
83 medical students in conflict-affected regions [23] and to our knowledge this is the first of its kind  
84 to focus on sub-Saharan Africa. Examining the psychological impact on this particular group will  
85 provide valuable insights into the experiences of medical students and interns to help develop  
86 targeted interventions to mitigate the adverse effects perhaps of both the ongoing conflict as well

87 as others that may, unfortunately, follow, by observing the prevalence of certain psychological  
88 disorders and their correlates.

## 89 **Materials and methods**

### 90 **Study design, setting, and period**

91 An online cross-sectional survey was conducted on medical students and interns who were  
92 studying and have graduated from approximately 72 Sudanese medical schools at the beginning  
93 of the civil war, using a secure survey platform during September 11th to 30th, 2023. The data was  
94 collected anonymously while attempting to maximize participation to result in statistically  
95 significant and representative sample as far as conditions could permit. Data collectors were  
96 blinded to ensure confidentiality.

### 97 **Sample size and sampling technique**

98 The sample size calculation was performed using the formula  $n = \frac{Z^2 p(1-p)}{d^2}$  and was based on  
99 previously reported prevalence of depression in medical students during the COVID-19 Lockdown  
100 period in Sudan [24]. In this formula  $n$  represents the calculated sample size,  $p$  denotes the  
101 depression prevalence from the earlier study (0.75),  $Z$  is this chosen confidence level (1.69), and  
102  $d$  indicates the desired level of precision (0.01). The resulting sample size was determined to be  
103 5355 students.

104 To ensure a more comprehensive representation and greater generalizability of the findings, and  
105 considering the possibility of missing responses, an additional 20% was added to the minimum  
106 required sample size, bringing it to 6426. Respondents were not pressured into answering and it  
107 was made clear that the data to be collected will be for research purposes.

108 Convenience, referral, and snowball sampling were the methods employed to select participants  
109 for this study considering the circumstances. Medical students were recruited based on their  
110 accessibility and willingness to participate while being encouraged to introduce others to the study.  
111 Efforts were made to reach out to a diverse range of medical students by utilizing various channels  
112 such as social media groups and batch coordinators. However, it is important to acknowledge that  
113 these methods of sampling may have introduced selection bias, as individuals who are easily  
114 accessible or motivated to participate may differ from the general population of medical students,  
115 and therefore efforts were made to minimize this bias. This was achieved by actively promoting  
116 participation among medical students from different medical schools and geographic regions  
117 affected by the armed conflict, and those who have fled Sudan altogether, with an aim at a  
118 considerable sample size. Those whose contributions were found to be significant were noted  
119 accordingly as contributors.

## 120 **Participants**

121 Those included will be currently enrolled medical students in a Sudanese medical school,  
122 regardless of the stage of study (i.e., undergraduates), and those who are fresh postgraduate  
123 students, (i.e., interns), while excluding Individuals who were previously enrolled in a medical  
124 school but have permanently withdrawn or discontinued their studies or switched their field of  
125 study prior to the conflict, and non-medical college students.

## 126 **Study instruments**

127 The study utilized a structured questionnaire of 49 items administered through an online survey  
128 platform across several parts. The questionnaire included validated Arabic and English versions  
129 (S1 Questionnaire English, S2 Questionnaire Arabic) as follows:

130 The patient health questionnaire (PHQ-9) for depression, the Generalized Anxiety Disorder Scale  
131 (GAD-7) questionnaire, the International Trauma Questionnaire (ITQ) for PTSD, and the Athens  
132 Insomnia Scale (AIS-8). The questionnaire collected information related to depression, anxiety,  
133 sleep disorders, and PTSD symptoms as the core of the study. Demographic information, such as  
134 age, gender, socioeconomic status, and proximity to conflict areas, have also been included.

135 The first part of the structured questionnaire is an introduction to the questionnaire and where  
136 consent is provided.

137 The second part of the structured questionnaire contains demographic characteristics, including  
138 age, gender, year of study, and SocioEconomic Status (SES).

139 The third part questionnaire aims to understand the impact of the armed conflict on individuals'  
140 lives, Respondents were asked about their residential location's proximity to conflict zones, their  
141 current residential status, and explores experiences of violence, changes to socioeconomic status,  
142 living arrangements, personal losses, and trauma to family members, friends, or colleagues.

143 The fourth part involved a patient health questionnaire known as PHQ-9 which has a sensitivity of  
144 88% and specificity of 85%, to assess the severity of depression [25]. This validated 9-item  
145 questionnaire in both Arabic and English versions [26, 27] allows individuals to rate their  
146 depressive symptoms on a scale of 0 (not at all) to 3 (nearly every day) for each of the 9 questions  
147 [27]. The total score ranges from 0 to 27, and based on the scores, depression levels were  
148 categorized as minimal (0-4), mild (5-9), moderate (10-14), moderately severe (15-19), or severe  
149 (20-27) [28]. A PHQ-9 cut-off score of  $\geq 15$  was chosen to detect depressive symptoms, with a  
150 positive predictive value (PPV) of 51% [27].

151 The fifth part of the questionnaire in both Arabic and English versions involves the questionnaire  
152 for PTSD, the ITQ with its diagnostic algorithm which involves the endorsement of at least one  
153 symptom from each of the following: the Reexperience cluster, AND the Avoidance cluster, AND  
154 the sense of Current threat cluster, AND the indicators of functional impairment (due to these  
155 symptoms) [29-31].

156 The sixth part of the questionnaire involves the questionnaire for GAD: GAD-7. This questionnaire  
157 involves 7 items with a Sensitivity of 89%, and Specificity of 82% [32]. This questionnaire has  
158 been validated in both Arabic and English versions [26, 33, 34], and was filled with a Likert scale  
159 from 0 (Not at all), through 1 (Several days), 2 (More than half the days), to 3 (Nearly every day).  
160 the ranges are then as follow: 0-4 is considered Normal, 5-9 as Mild, 10-14 as Moderate, and 15-  
161 21 as Severe [35]. a Cut-off point of  $\geq 15$  is taken to indicate anxiety symptoms despite the loss in  
162 sensitivity, becoming 48% [32].

163 The seventh part of the questionnaire involves the questionnaire for sleep difficulties. The AIS-8  
164 is a validated questionnaire [36, 37], which is composed of 8 questions, evaluating Onset of sleep,  
165 waking during the night and early morning, duration of sleep, and quality of sleep, frequency and  
166 duration of complaints, and the distress associated with insomnia, and daytime dysfunction, using  
167 a Likert scale of 0-3, with a cut-off score of 6 suggested by Soldatos et. al as they found it spots  
168 9/10 cases [36, 38]

169 The eighth part of the questionnaire is for follow-up studies, requesting email address for contact  
170 at the volunteer's discretion.



## 171 **Statistical analysis**

172 The data collected via the questionnaire were imported into MS Excel 2016, then into IBM SPSS  
173 version 25 for analysis, and Normality was tested via the Kolmogorov-Smirnov test, finding the  
174 data to be non-Gaussian, hence the expression of data as “Median (25<sup>th</sup>-75<sup>th</sup> quartiles)”. Mann-  
175 Whitney U-test was utilized to determine differences in PHQ9, GAD-7, and AIS-8 scores in  
176 binomial categories, and Kruskal-Wallis H-Test was used to determine differences in multinomial  
177 categories, and the Descriptives included frequencies, percentages, means, medians, and  
178 interquartile ranges considering the non-parametric nature of the data. Chi-Squared test of  
179 independence determined the associations between study variables and the psychiatric conditions  
180 in question, Spearman correlation assessed the relationship between mental health parameters, age,  
181 level of education, SES change, and number of events experienced. A binominal logistic regression  
182 model served to tease out the effect of study variables, and the likelihood of participants suffering  
183 depression, anxiety, PTSD, and insomnia. Nagelkerke R-Squared calculated the explained  
184 variation. Omnibus test of coefficients showed the overall statistical significance of the prediction  
185 model. Adjusted Odds Ratios (AOR) were expressed with their calculated 95% CI. Statistical  
186 significance was set at  $p < 0.05$  level.

## 187 **Ethical approval**

188 Ethical approval was obtained from the Quality Directorate Office – Merowe Medical City,  
189 Merowe, Northern State, Sudan.

190 All participants provided written consent before participating in the study, without any  
191 identification data. Emails were collected at the end of the survey at the discretion of participants  
192 for follow up studies, after completing the survey to avoid bias.

## 193 Results

194 The Survey was conducted in September of 2023, resulting in 7306 responses, of which 665 were  
 195 excluded, and 6641 were included (Table 1), of which 2370 (35.7%) were males and 4271 (64.3%)  
 196 were females. The mean age of study participants was  $22.57 \pm 2.68$  years, and 2801 (42.2%)  
 197 students were in the preclinical years. Of the participants, 67.7% were of middle socioeconomic  
 198 status, 4734 (71.3%) were displaced, and 1016 (15.3%) were in conflict zones at the time of the  
 199 study. We found overall prevalences of 33.7% for depression, 22.4% for anxiety, 59.5% for  
 200 Insomnia, and 13.6% for PTSD.

201 **Table 1. Participant general characteristics and median (25th–75th quartile) scores of PHQ-**  
 202 **9, GAD-7, and AIS-8 crossed with participants characteristics.**

| Variables                        | All participant<br>n (%) | Depression score<br>Median (Q1-Q3) | Anxiety Score<br>Median (Q1-Q3) | Insomnia score<br>Median (Q1-Q3) |
|----------------------------------|--------------------------|------------------------------------|---------------------------------|----------------------------------|
| <b>Overall</b>                   | n=6641                   | 11 (7-17)                          | 8 (4-14)                        | 7 (4-11)                         |
| <b>Age</b>                       |                          |                                    |                                 |                                  |
| <21                              | 1522 (22.9)              | 10 (6-16)                          | 8 (4-14)                        | 7 (3-11)                         |
| 21-24                            | 3594 (54.1)              | 11 (7-17)                          | 8 (4-14)                        | 7 (4-11)                         |
| >24                              | 1525 (23)                | 12 (7-18)                          | 8 (4-14)                        | 8 (4-13)                         |
| p-value                          |                          | <0.001**                           | 0.233                           | <0.001**                         |
| <b>Gender</b>                    |                          |                                    |                                 |                                  |
| Male                             | 2370 (35.7)              | 9 (5-16)                           | 7 (3-13)                        | 6 (3-11)                         |
| Female                           | 4271 (64.3)              | 12 (8-18)                          | 9 (5-15)                        | 7 (4-12)                         |
| p-value                          |                          | <0.001**                           | <0.001**                        | <0.001**                         |
| <b>Marital Status</b>            |                          |                                    |                                 |                                  |
| Single                           | 6352 (95.6)              | 11 (7-17)                          | 8 (4-14)                        | 7 (4-11)                         |
| Married                          | 248 (3.7)                | 12 (8-17)                          | 9 (5-14)                        | 8 (4-13)                         |
| others (Divorced, Widowed, etc.) | 41 (0.6)                 | 13 (8-19)                          | 9 (5-15)                        | 8 (4-14)                         |

|                                       |             |           |           |          |
|---------------------------------------|-------------|-----------|-----------|----------|
| p-value                               |             | 0.126     | 0.238     | 0.006*   |
| <b>Socioeconomic status</b>           |             |           |           |          |
| Low-income                            | 1715 (25.8) | 13 (8-19) | 10 (6-16) | 8 (5-13) |
| Middle-income                         | 4499 (67.7) | 10 (6-16) | 8 (4-13)  | 7 (3-11) |
| High-income                           | 427 (6.4)   | 8 (4-15)  | 6 (2-12)  | 5 (2-10) |
| p-value                               |             | <0.001**  | <0.001**  | <0.001** |
| <b>Level of Education</b>             |             |           |           |          |
| Pre-clinical year                     | 2801 (42.2) | 11 (7-17) | 8 (4-14)  | 7 (3-11) |
| Clinical year                         | 2349 (35.4) | 11 (7-17) | 8 (4-14)  | 7 (4-11) |
| Internship                            | 1491 (22.5) | 11 (7-18) | 8 (5-14)  | 8 (4-13) |
| p-value                               |             | 0.005*    | 0.345     | <0.001** |
| <b>Living arrangement</b>             |             |           |           |          |
| With family                           | 5957 (89.7) | 11 (7-17) | 8 (4-14)  | 7 (4-11) |
| With friends and colleagues           | 498 (7.5)   | 12 (8-18) | 9 (6-15)  | 8 (5-13) |
| Alone                                 | 186 (2.8)   | 13 (8-20) | 11 (6-16) | 9 (4-14) |
| p-value                               |             | <0.001**  | <0.001**  | <0.001** |
| <b>Internal\external displacement</b> |             |           |           |          |
| Non-displaced                         | 1907 (28.7) | 10 (6-16) | 7 (3-13)  | 6 (3-9)  |
| Internally displaced                  | 1690 (25.4) | 11 (7-17) | 9 (5-14)  | 7 (4-11) |
| Externally displaced                  | 3044 (45.8) | 12 (7-18) | 9 (5-14)  | 8 (4-12) |
| p-value                               |             | <0.001**  | <0.001**  | <0.001** |
| <b>Living in conflict zone</b>        |             |           |           |          |
| Yes                                   | 1016 (15.3) | 12 (8-18) | 9 (5-15)  | 7 (4-12) |
| No                                    | 5625 (84.7) | 11 (7-17) | 8 (4-14)  | 7 (4-11) |
| p-value                               |             | 0.005*    | <0.001**  | 0.004*   |

203 \*Significant at  $p < 0.05$ , \*\*Significant at  $p < 0.001$ .

204 The total respondents suffering loss of family members, friends, or colleagues due to the armed  
 205 conflict in Sudan were 1926 (29%) (S3 Table 1). In a similar vein, 2770 (41.7%) have suffered  
 206 injuries to family members, friends, or colleagues due to the armed conflict in Sudan, and 1168

207 (17.6%) have witnessed or suffered direct attacks, such physical assaults, bombings, shootings,  
208 kidnap, or torture, and 1990 participants (30%) have suffered destruction or loss of property, and  
209 298 (4.5%) have suffered or witnessed gender-specific violence (GSV) (other than sexual violence,  
210 e.g. hair shaved, insults, etc...), and 72 (1.1%) have suffered or witnessed rape or sexual violence,  
211 and 1170 (17.6%) have witnessed violence against others.

212 Depression symptoms were assessed with the PHQ-9 scale, and the results were classified into five  
213 degrees in term of the severity of depression (Table 2). The PHQ-9 score ranged from 0 to 27, with  
214 a median of 11 (IQR: 7-17), while the mean ( $\pm$ SD) score of depression symptoms was 11.93  
215 ( $\pm$ 6.86), thus indicating moderate depression. A total of 5634 (84.8) of the participants had  
216 different degrees of depression. In addition, 2241 (33.7%) students had a PHQ-9 score of  $\geq$ 15,  
217 which is indicative of moderately severe to severe depression. Suicidal ideation appeared in 2213  
218 (33.3%) of students, as follows: several days 1203 (18.1%), more than half of the days 410 (6.2%),  
219 and 600 (9%) nearly every day.

220 **Table 2. Scores, Frequencies, and Gradings using relevant measures.**

| Category                  | Grade (score range)       | Frequency | percentage |
|---------------------------|---------------------------|-----------|------------|
| <b>Depression (PHQ-9)</b> | Minimal (0-4)             | 1007      | 15.2       |
|                           | Mild (5-9)                | 1875      | 28.2       |
|                           | Moderate (10-14)          | 1518      | 22.9       |
|                           | Moderately severe (15-19) | 1198      | 18         |
|                           | Severe (20-27)            | 1043      | 15.7       |
| <b>Anxiety (GAD-7)</b>    | Normal (0-4)              | 1733      | 26.1       |
|                           | Mild (5-9)                | 2086      | 31.4       |
|                           | Moderate (10-14)          | 1334      | 20.1       |
|                           | Severe (15-21)            | 1488      | 22.4       |
| <b>Insomnia (AIS-8)</b>   | None (0-5)                | 2689      | 40.5       |

|                   |                       |      |      |
|-------------------|-----------------------|------|------|
|                   | Mild (6-9)            | 1790 | 27   |
|                   | Moderate (10-15)      | 1556 | 23.4 |
|                   | Severe ( $\geq 16$ )  | 606  | 9.1  |
| <b>PTSD (ITQ)</b> | Avoidance             | 2651 | 39.9 |
|                   | Reexperience          | 2651 | 33.9 |
|                   | Current threat        | 3026 | 45.6 |
|                   | Functional impairment | 3670 | 55.3 |
|                   | Met criteria for PTSD | 901  | 13.6 |

221 \*Significant at  $p < 0.05$ , \*\*Significant at  $p < 0.001$ .

222 The Analysis reveals a significant association between depressive symptoms and several  
 223 demographic and situational variables as illustrated in (Table 3). Notably, individuals aged 21-24  
 224 exhibit a higher prevalence of depressive symptoms, and females are more susceptible than males.  
 225 Socioeconomic status demonstrates a strong link, especially in those of lower income. Living alone  
 226 and external displacement are associated with higher depressive symptom rates. Additionally,  
 227 being in the conflict zone and exposure to injuries are linked to increased depressive symptoms,  
 228 especially exposure to death and material losses. Direct attacks, destruction/loss of property,  
 229 gender-specific violence, rape, or sexual violence were all linked to elevated depressive symptoms.

230 **Table 3. Prevalence and association of Depression and Anxiety symptoms with the study**  
 231 **variables.**

| Variables      | No depressive Symptoms (PHQ-9 <15)<br>n (%) | Depressive Symptoms (PHQ-9 $\geq 15$ )<br>n (%) | $\chi^2$ | p-value | No Anxiety Symptoms (GAD-7 <15)<br>n (%) | Anxiety Symptoms (GAD-7 $\geq 15$ )<br>n (%) | $\chi^2$ | p-value |
|----------------|---------------------------------------------|-------------------------------------------------|----------|---------|------------------------------------------|----------------------------------------------|----------|---------|
| <b>Overall</b> | n=4400 (66.3)                               | n=2241 (33.7)                                   |          |         | n=5153 (77.6)                            | n=1488 (22.4)                                |          |         |
| <b>Age</b>     |                                             |                                                 | 12.45    | 0.002*  |                                          |                                              | 3.15     | 0.21    |
| <21            | 1063 (24.2)                                 | 459 (20.5)                                      |          |         | 1171 (22.7)                              | 351 (23.6)                                   |          |         |

|                                       |             |             |        |          |             |             |       |          |
|---------------------------------------|-------------|-------------|--------|----------|-------------|-------------|-------|----------|
| 21-24                                 | 2359 (53.6) | 1235 (55.1) |        |          | 2818 (54.7) | 776 (52.2)  |       |          |
| >24                                   | 978 (22.2)  | 547 (24.4)  |        |          | 1164 (22.6) | 361 (24.3)  |       |          |
| <b>Gender</b>                         |             |             | 55.68  | <0.001** |             |             | 50.8  | <0.001** |
| Male                                  | 1708 (38.8) | 662 (29.5)  |        |          | 1955 (37.9) | 415 (27.9)  |       |          |
| Female                                | 2692 (61.2) | 1579 (70.5) |        |          | 3198 (62.1) | 1073 (72.1) |       |          |
| <b>Marital Status</b>                 |             |             | 0.68   | 0.71     |             |             | 0.81  | 0.67     |
| Single                                | 4215 (95.8) | 2137 (95.4) |        |          | 4935 (95.8) | 1417 (95.2) |       |          |
| Married                               | 159 (3.6)   | 89 (4)      |        |          | 187 (3.6)   | 61 (4.1)    |       |          |
| Others (Divorced, Widowed, etc.)      | 26 (0.6)    | 15 (0.7)    |        |          | 31 (0.6)    | 10 (0.7)    |       |          |
| <b>Socioeconomic status</b>           |             |             | 118.32 | <0.001** |             |             | 77.55 | <0.001** |
| Low-income                            | 957 (21.8)  | 758 (33.8)  |        |          | 1200 (23.3) | 515 (34.6)  |       |          |
| Middle-income                         | 3123 (71)   | 1376 (61.4) |        |          | 3606 (70)   | 893 (60)    |       |          |
| High-income                           | 320 (7.3)   | 107 (4.8)   |        |          | 347 (6.7)   | 80 (5.4)    |       |          |
| <b>SES change</b>                     |             |             | 68.34  | <0.001** |             |             | 59.25 | <0.001** |
| significant deterioration             | 27 (0.6)    | 38 (1.7)    |        |          | 34 (0.7)    | 31 (2.1)    |       |          |
| Deteriorate                           | 1030 (23.4) | 695 (31)    |        |          | 1256 (24.2) | 469 (31.5)  |       |          |
| Unchanged                             | 3264 (74.2) | 1482 (66.1) |        |          | 3783 (73.4) | 963 (64.7)  |       |          |
| Improved                              | 78 (1.8)    | 26 (1.2)    |        |          | 79 (1.5)    | 25 (1.7)    |       |          |
| Significant improvement               | 1 (0.01)    | 0           |        |          | 1 (0.01)    | 0           |       |          |
| <b>Level of Education</b>             |             |             | 8.15   | 0.01*    |             |             | 0.82  | 0.66     |
| Pre-clinical year                     | 1910 (43.3) | 891 (39.8)  |        |          | 2161 (41.9) | 640 (43)    |       |          |
| Clinical year                         | 1526 (34.7) | 823 (36.7)  |        |          | 1837 (35.6) | 512 (34.4)  |       |          |
| Internship                            | 964 (21.9)  | 527 (23.5)  |        |          | 1155 (22.4) | 336 (22.6)  |       |          |
| <b>Living arrangement</b>             |             |             | 10.19  | 0.006*   |             |             | 13.07 | 0.001*   |
| With family                           | 3968 (90.2) | 1989 (88.8) |        |          | 4653 (90.3) | 1304 (87.6) |       |          |
| With friends and colleagues           | 329 (7.5)   | 169 (7.5)   |        |          | 374 (7.3)   | 124 (8.3)   |       |          |
| Alone                                 | 103 (2.3)   | 83 (3.7)    |        |          | 126 (2.4)   | 60 (4)      |       |          |
| <b>Internal/external displacement</b> |             |             | 38.93  | <0.001** |             |             | 27.35 | <0.001** |
| Non-displaced                         | 1364 (31.0) | 543 (24.2)  |        |          | 1559 (30.3) | 348 (28.7)  |       |          |
| Internally displaced                  | 1121 (25.5) | 569 (25.4)  |        |          | 1295 (25.1) | 395 (25.4)  |       |          |
| Externally displaced                  | 1915 (43.5) | 1129 (50.4) |        |          | 2299 (44.6) | 745 (45.8)  |       |          |

|                                                                                                |             |             |        |          |             |             |       |          |
|------------------------------------------------------------------------------------------------|-------------|-------------|--------|----------|-------------|-------------|-------|----------|
| <b>Living in conflict zone</b>                                                                 |             |             | 5.37   | 0.021*   |             |             | 11.49 | <0.001** |
| Yes                                                                                            | 641 (14.6)  | 375 (16.7)  |        |          | 747 (14.5)  | 747 (14.5)  |       |          |
| No                                                                                             | 3759 (85.4) | 1866 (83.3) |        |          | 4406 (85.5) | 4406 (85.5) |       |          |
| <b>Injury Exposure</b>                                                                         |             |             | 73.84  | <0.001** |             |             | 38.04 | <0.001** |
| Yes                                                                                            | 1672 (38)   | 1098 (49)   |        |          | 2046 (39.7) | 724 (48.7)  |       |          |
| No                                                                                             | 2728 (62)   | 1143 (51.0) |        |          | 3107 (60.3) | 764 (51.3)  |       |          |
| <b>Death Exposure</b>                                                                          |             |             | 48.74  | <0.001** |             |             | 43.29 | <0.001** |
| Yes                                                                                            | 1154 (26.2) | 772 (34.3)  |        |          | 1393 (27)   | 533 (35.8)  |       |          |
| No                                                                                             | 3246 (73.8) | 1469 (65.6) |        |          | 3760 (73)   | 955 (64.2)  |       |          |
| <b>Direct attacks, such as physical assaults, bombings, shootings, kidnap, or torture</b>      |             |             | 64.54  | <0.001** |             |             | 54.26 | <0.001** |
| Yes                                                                                            | 656 (14.9)  | 512 (22.8)  |        |          | 811 (15.7)  | 357 (24)    |       |          |
| No                                                                                             | 3744 (85.1) | 1729 (77.2) |        |          | 4342 (84.3) | 1131 (76)   |       |          |
| <b>Experiencing destruction or loss of property</b>                                            |             |             | 140.82 | <0.001** |             |             | 83.35 | <0.001** |
| Yes                                                                                            | 1109 (25.2) | 881 (39.3)  |        |          | 1402 (27.2) | 588 (39.5)  |       |          |
| No                                                                                             | 3291 (74.8) | 1360 (60.7) |        |          | 3751 (72.8) | 900 (60.5)  |       |          |
| <b>Gender-specific violence (other than sexual violence, e.g., hair shaved, insults, etc.)</b> |             |             | 59.32  | <0.001** |             |             | 48.97 | <0.001** |
| Yes                                                                                            | 136 (3.1)   | 162 (7.2)   |        |          | 182 (3.5)   | 116 (7.8)   |       |          |
| No                                                                                             | 4264 (96.9) | 2079 (92.8) |        |          | 4971 (96.5) | 1372 (92.2) |       |          |
| <b>Rape or sexual violence</b>                                                                 |             |             | 0.68   | 0.03*    |             |             | 1.91  | 0.19     |
| Yes                                                                                            | 39 (0.9)    | 33 (1.5)    |        |          | 51 (1)      | 21 (1.4)    |       |          |
| No                                                                                             | 4361 (99.1) | 2208 (98.5) |        |          | 5102 (99)   | 1467 (98.6) |       |          |
| <b>Witnessing violence against others</b>                                                      |             |             | 118.32 | <0.001** |             |             | 72    | <0.001** |
| Yes                                                                                            | 629 (14.3)  | 541 (24.1)  |        |          | 798 (15.5)  | 372 (25)    |       |          |
| No                                                                                             | 3771 (85.7) | 1700 (75.9) |        |          | 4355 (84.5) | 1116 (75)   |       |          |

232 \*Significant at  $p < 0.05$ , \*\*Significant at  $p < 0.001$ .

233 The logistical regression model for depression (Table 4) was statistically significant for  $\chi^2(17) =$   
 234 457.968,  $p < 0.001$ , and it explained 9.2% (Nagelkerke R<sup>2</sup>) of the variance, classifying 68.21% of  
 235 cases, at a sensitivity of 25% and specificity of 90%, and with a positive predictive value 56% of  
 236 and negative predictive value of 70%. The most significant, impactful predictive factors are the  
 237 following, in descending order: Low SES (OR: 2.06), being female (OR: 1.86), Gender-Specific  
 238 Violence (OR:1.59), experiencing destruction or loss of property (OR: 1.54), living alone (OR:  
 239 1.4), witnessing violence against others (OR: 1.34), suffering direct assault and exposure to injuries  
 240 (OR: 1.28), displacement (OR: 1.22), and exposure to death (OR: 1.16).

241 **Table 4. Binomial logistical regression model predicting the likelihood for Depression and**  
 242 **Anxiety symptoms based on the study characteristics.**

| Independent Variables       | Dependent variable: Depression |               |       |          | Dependent variable: Anxiety |               |       |          |
|-----------------------------|--------------------------------|---------------|-------|----------|-----------------------------|---------------|-------|----------|
|                             | AOR                            | 95% CI of AOR |       | p-value  | AOR                         | 95% CI of AOR |       | p-value  |
|                             |                                | Lower         | Upper |          |                             | Lower         | Upper |          |
| Age                         | 1.02                           | 1.01          | 1.05  | 0.04*    | 1.03                        | 1.01          | 1.06  | 0.05     |
| <b>Gender</b>               |                                |               |       |          |                             |               |       |          |
| Male                        | Reference                      |               |       |          | Reference                   |               |       |          |
| Female                      | 1.86                           | 1.65          | 2.1   | <0.001** | 1.96                        | 1.71          | 2.24  | <0.001** |
| <b>Socioeconomic status</b> |                                |               |       |          |                             |               |       |          |
| Low-income                  | 2.06                           | 1.61          | 2.64  | <0.001** | 1.57                        | 1.19          | 2.07  | 0.001*   |
| Middle-income               | 1.24                           | 0.98          | 1.57  | 0.63     | 1.01                        | 0.78          | 1.38  | 0.94     |
| High-income                 | Reference                      |               |       |          | Reference                   |               |       |          |
| <b>Level of Education</b>   |                                |               |       |          |                             |               |       |          |
| Pre-clinical year           | Reference                      |               |       |          | Reference                   |               |       |          |
| Clinical year               | 1.08                           | 0.94          | 1.24  | 0.25     | 0.86                        | 0.72          | 1.01  | 0.06     |
| Internship                  | 0.93                           | 0.77          | 1.11  | 0.44     | 0.75                        | 0.61          | 0.92  | 0.007*   |
| <b>Living arrangement</b>   |                                |               |       |          |                             |               |       |          |



|                                                                                           |           |      |      |          |           |      |      |          |
|-------------------------------------------------------------------------------------------|-----------|------|------|----------|-----------|------|------|----------|
| With family                                                                               | Reference |      |      |          | Reference |      |      |          |
| With friends and colleagues                                                               | 0.96      | 0.78 | 1.18 | 0.71     | 1.18      | 0.94 | 1.49 | 0.13     |
| Alone                                                                                     | 1.4       | 1.02 | 1.91 | 0.03*    | 1.51      | 1.08 | 2.10 | 0.01*    |
| <b>Displacement</b>                                                                       |           |      |      |          |           |      |      |          |
| Non-displaced                                                                             | Reference |      |      |          | Reference |      |      |          |
| Displaced                                                                                 | 1.22      | 1.08 | 1.39 | 0.002*   | 1.30      | 1.12 | 1.51 | <0.001** |
| <b>Living in conflict zone</b>                                                            |           |      |      |          |           |      |      |          |
| No                                                                                        | Reference |      |      |          | Reference |      |      |          |
| Yes                                                                                       | 0.98      | 0.84 | 1.15 | 0.88     | 1.14      | 0.97 | 1.35 | 0.11     |
| <b>Injury Exposure</b>                                                                    |           |      |      |          |           |      |      |          |
| No                                                                                        | Reference |      |      |          | Reference |      |      |          |
| Yes                                                                                       | 1.28      | 1.13 | 1.45 | <0.001*  | 1.12      | 0.97 | 1.92 | 0.95     |
| <b>Death Exposure</b>                                                                     |           |      |      |          |           |      |      |          |
| No                                                                                        | Reference |      |      |          | Reference |      |      |          |
| Yes                                                                                       | 1.16      | 1.01 | 1.33 | 0.02*    | 1.27      | 1.1  | 1.48 | 0.001*   |
| <b>Direct attacks, such as physical assaults, bombings, shootings, kidnap, or torture</b> |           |      |      |          |           |      |      |          |
| No                                                                                        | Reference |      |      |          | Reference |      |      |          |
| Yes                                                                                       | 1.28      | 1.11 | 1.48 | <0.001** | 1.29      | 1.11 | 1.51 | 0.001*   |
| <b>Experiencing destruction or loss of property</b>                                       |           |      |      |          |           |      |      |          |
| No                                                                                        | Reference |      |      |          | Reference |      |      |          |
| Yes                                                                                       | 1.54      | 1.36 | 1.74 | <0.001** | 1.41      | 1.23 | 1.61 | <0.001** |
| <b>Gender-specific violence</b>                                                           |           |      |      |          |           |      |      |          |
| No                                                                                        | Reference |      |      |          | Reference |      |      |          |
| Yes                                                                                       | 1.59      | 1.22 | 2.07 | <0.001** | 1.58      | 1.21 | 2.08 | <0.001** |
| <b>Rape or sexual violence</b>                                                            |           |      |      |          |           |      |      |          |
| No                                                                                        | Reference |      |      |          | Reference |      |      |          |
| Yes                                                                                       | 0.71      | 0.43 | 1.19 | 0.2      | 0.59      | 0.33 | 1.04 | 0.07     |
| <b>Witnessing violence against others</b>                                                 |           |      |      |          |           |      |      |          |

|     |           |      |      |          |           |      |      |          |
|-----|-----------|------|------|----------|-----------|------|------|----------|
| No  | Reference |      |      |          | Reference |      |      |          |
| Yes | 1.34      | 1.16 | 1.55 | <0.001** | 1.31      | 1.11 | 1.54 | <0.001** |

243 \*Significant at  $p < 0.05$ , \*\*Significant at  $p < 0.001$ .

244 Anxiety symptoms were assessed with the GAD-7 scale, and the results were classified  
 245 accordingly into degrees of anxiety (Table 2). The median was 8 for mild anxiety (4-14), with a  
 246 mean of 9.26 ( $\pm 6.08$ ). A total of 1488 (22.4%) scored  $\geq 15$  for severe anxiety. According to GAD-7  
 247 categorization, 1733 (26.1) of medical students demonstrate a lack of anxiety symptoms. In  
 248 contrast, 4908 (73.9%) of students exhibited varying levels of anxiety: 31.4% reported mild  
 249 anxiety, 20.1% moderate anxiety, and 22.4% experienced severe anxiety. The prevalence of  
 250 anxiety symptoms and their association with various factors were investigated (Table 4). The  
 251 logistical regression model for Anxiety (Table 4) was statistically significant for  $\chi^2(17) = 334.4$ ,  
 252  $p < 0.001$ , and it explained 7% (Nagelkerke  $R^2$ ) of the variance, classifying 75.7% of cases, at a  
 253 sensitivity of 18.9% and specificity of 92.1%, and with a positive predictive value 40.7% of and  
 254 negative predictive value of 79.7%. There is a significant association across several variables. a  
 255 significant gender difference emerges, with females exhibiting a higher prevalence of anxiety  
 256 symptoms. Socioeconomic status demonstrates a strong association, indicating a higher prevalence  
 257 among low-income individuals. injury exposure and death exposure are significantly linked to a  
 258 higher prevalence of anxiety symptoms. Additionally, being exposed to direct attack,  
 259 destruction/loss of property, and gender-specific violence, were all linked to increased anxiety  
 260 symptoms. The most significant, impactful predictive factors are the following, in descending  
 261 order: Being female (OR: 1.96), Gender Specific Violence (OR: 1.58), low SES (OR: 1.57), Living  
 262 alone (OR: 1.51), loss/destruction of property (OR: 1.41), witnessing violence against others (OR:  
 263 1.31), suffering direct assault (OR: 1.29), exposure to death (OR: 1.27).

264 Insomnia symptoms were assessed with the AIS-8 scale, and the scores were stratified accordingly  
 265 into degrees of insomnia (Table 2). In total (Table 1), the median was 7 for minimal insomnia (4-  
 266 11), with a mean of 7.75 ( $\pm 5.25$ ). A total 3952 (59.5%) of participants have different degree of  
 267 insomnia: as follow (33.7%) experienced mild degrees of insomnia, (10.3%) moderate, and (1.3%)  
 268 severe insomnia. In term of association, statically significant associations were found in all study  
 269 variables except for age group, marital status, and level of education, as showed in Table 5.

270 **Table 5. Prevalence and association of insomnia and PTSD symptoms crossed with the study**  
 271 **variables.**

| Variables                        | No Insomnia Symptoms (AIS-8 <6)<br>n (%) | Insomnia Symptoms (AIS-8 $\geq$ 6)<br>n (%) | $\chi^2$ | p-value  | No PTSD Symptoms Criteria not met<br>n (%) | PTSD Symptoms Met criteria<br>n (%) | $\chi^2$ | p-value  |
|----------------------------------|------------------------------------------|---------------------------------------------|----------|----------|--------------------------------------------|-------------------------------------|----------|----------|
| <b>Overall</b>                   | n=2686 (40.5)                            | n=3952 (59.5)                               |          |          | n=5740 (86.4)                              | n=901 (13.6)                        |          |          |
| <b>Age</b>                       |                                          |                                             | 12.51    | 0.002*   |                                            |                                     | 7.76     | 0.02*    |
| <21                              | 51 (24.2)                                | 871 (22)                                    |          |          | 1331 (23.2)                                | 191 (21.2)                          |          |          |
| 21-24                            | 1477 (54.9)                              | 2117 (53.6)                                 |          |          | 3123 (54.4)                                | 471 (52.3)                          |          |          |
| >24                              | 561 (20.9)                               | 964 (24.4)                                  |          |          | 1286 (22.4)                                | 239 (26.5)                          |          |          |
| <b>Gender</b>                    |                                          |                                             | 31.97    | <0.001** |                                            |                                     | 39.05    | <0.001** |
| Male                             | 1068 (39.7)                              | 1302 (32.9)                                 |          |          | 2130 (37.1)                                | 238 (26.4)                          |          |          |
| Female                           | 1621 (60.3)                              | 2650 (67.1)                                 |          |          | 3608 (62.9)                                | 663 (73.6)                          |          |          |
| <b>Marital Status</b>            |                                          |                                             | 8.16     | 0.017*   |                                            |                                     | 8.91     | 0.012*   |
| Single                           | 2595 (96.5)                              | 3757 (95.1)                                 |          |          | 5507 (95.9)                                | 845 (93.8)                          |          |          |
| Married                          | 82 (3)                                   | 166 (4.2)                                   |          |          | 199 (3.5)                                  | 49 (5.4)                            |          |          |
| Others (Divorced, Widowed, etc.) | 12 (0.4)                                 | 29 (0.7)                                    |          |          | 34 (0.6)                                   | 7 (0.8)                             |          |          |
| <b>Socioeconomic status</b>      |                                          |                                             | 108.73   | <0.001** |                                            |                                     | 49.07    | <0.001** |
| Low-income                       | 529 (19.7)                               | 1186 (30)                                   |          |          | 1397 (24.3)                                | 318 (35.3)                          |          |          |

|                                       |             |             |        |          |             |            |       |          |
|---------------------------------------|-------------|-------------|--------|----------|-------------|------------|-------|----------|
| Middle-income                         | 1930 (71.8) | 2569 (65)   |        |          | 3963 (69)   | 536 (59.5) |       |          |
| High-income                           | 230 (8.6)   | 197 (5)     |        |          | 380 (6.6)   | 47 (5.2)   |       |          |
| <b>SES change</b>                     |             |             | 65.21  | <0.001** |             |            | 55.19 | <0.001** |
| significant deterioration             | 8 (0.3)     | 57 (1.4)    |        |          | 55 (1)      | 10 (1.1)   |       |          |
| Deteriorate                           | 590 (21.9)  | 1135 (28.7) |        |          | 1404 (24.5) | 321 (35.6) |       |          |
| Unchanged                             | 2051 (76.3) | 2695 (68.2) |        |          | 4195 (73.1) | 551 (61.2) |       |          |
| Improved                              | 40 (1.5)    | 64 (1.6)    |        |          | 85 (1.5)    | 19 (2.1)   |       |          |
| Significant improvement               | 0           | 1 (0.02)    |        |          | 1 (0.01)    | 0          |       |          |
| <b>Level of Education</b>             |             |             | 17.94  | <0.001** |             |            | 0.474 | 0.79     |
| Pre-clinical year                     | 1189 (44.2) | 1612 (40.8) |        |          | 2430 (42.3) | 371 (41.2) |       |          |
| Clinical year                         | 965 (35.9)  | 1384 (35)   |        |          | 2027 (35.3) | 322 (35.7) |       |          |
| Internship                            | 535 (19.9)  | 956 (24.2)  |        |          | 1283 (22.4) | 208 (23.1) |       |          |
| <b>Living arrangement</b>             |             |             | 41.84  | <0.001** |             |            | 6.95  | 0.03*    |
| With family                           | 2490 (92.6) | 3467 (87.7) |        |          | 5171 (90.1) | 786 (87.2) |       |          |
| With friends and colleagues           | 140 (5.2)   | 358 (9.1)   |        |          | 413 (7.2)   | 85 (9.4)   |       |          |
| Alone                                 | 59 (2.2)    | 127 (3.2)   |        |          | 156 (2.7)   | 30 (3.3)   |       |          |
| <b>Internal/external displacement</b> |             |             | 92.43  | <0.001** |             |            | 6.48  | 0.04*    |
| Non-displaced                         | 923 (34.3)  | 984 (24.9)  |        |          | 1680 (29.3) | 227 (25.2) |       |          |
| Internally displaced                  | 708 (26.3)  | 982 (24.8)  |        |          | 1454 (25.3) | 236 (26.2) |       |          |
| Externally displaced                  | 1058 (39.3) | 1986 (50.3) |        |          | 2606 (45.4) | 438 (48.6) |       |          |
| <b>Living in conflict zone</b>        |             |             | 18.77  | <0.001** |             |            | 10.89 | 0.001*   |
| Yes                                   | 349 (13)    | 667 (16.9)  |        |          | 845 (14.7)  | 171 (19)   |       |          |
| No                                    | 2340 (87)   | 3285 (83.1) |        |          | 4895 (85.3) | 730 (81)   |       |          |
| <b>Injury Exposure</b>                |             |             | 101.37 | <0.001** |             |            | 23.84 | <0.001** |
| Yes                                   | 923 (34.3)  | 1847 (46.7) |        |          | 2327 (40.5) | 443 (49.2) |       |          |
| No                                    | 1766 (65.7) | 2105 (53.3) |        |          | 3413 (59.5) | 458 (50.8) |       |          |
| <b>Death Exposure</b>                 |             |             | 80.49  | <0.001** |             |            | 46.87 | <0.001** |
| Yes                                   | 617 (22.9)  | 1309 (33.1) |        |          | 1578 (27.5) | 348 (38.6) |       |          |
| No                                    | 2072 (77.1) | 2643 (66.9) |        |          | 4162 (72.5) | 553 (61.4) |       |          |

|                                                                                           |             |             |        |          |             |            |       |          |
|-------------------------------------------------------------------------------------------|-------------|-------------|--------|----------|-------------|------------|-------|----------|
| <b>Direct attacks, such as physical assaults, bombings, shootings, kidnap, or torture</b> |             |             | 70.56  | <0.001** |             |            | 47.9  | <0.001** |
| Yes                                                                                       | 345 (12.8)  | 823 (20.8)  |        |          | 936 (16.3)  | 232 (25.7) |       |          |
| No                                                                                        | 2344 (87.2) | 3129 (79.2) |        |          | 4804 (83.7) | 669 (74.3) |       |          |
| <b>Experiencing destruction or loss of property</b>                                       |             |             | 137.35 | <0.001** |             |            | 61.2  | <0.001** |
| Yes                                                                                       | 591 (22)    | 1399 (35.4) |        |          | 1620 (28.2) | 370 (41.1) |       |          |
| No                                                                                        | 2098 (78)   | 2553 (64.6) |        |          | 4120 (71.8) | 531 (58.9) |       |          |
| <b>Gender-specific violence</b>                                                           |             |             | 41.98  | <0.001** |             |            | 7.26  | 0.009    |
| Yes                                                                                       | 67 (2.5)    | 231 (5.8)   |        |          | 242 (4.2)   | 56 (6.2)   |       |          |
| No                                                                                        | 2622 (97.5) | 3721 (94.2) |        |          | 5498 (95.8) | 845 (93.8) |       |          |
| <b>Rape or sexual violence</b>                                                            |             |             | 11.67  | <0.001** |             |            | 10.2  | 0.003    |
| Yes                                                                                       | 15 (0.6)    | 57 (1.4)    |        |          | 53 (0.9)    | 19 (2.1)   |       |          |
| No                                                                                        | 2674 (99.4) | 3895 (98.6) |        |          | 5687 (99.1) | 882 (97.9) |       |          |
| <b>Witnessing violence against others</b>                                                 |             |             | 128.48 | <0.001** |             |            | 70.49 | <0.001** |
| Yes                                                                                       | 301 (11.2)  | 869 (22)    |        |          | 922 (16.1)  | 248 (27.5) |       |          |
| No                                                                                        | 2388 (88.8) | 3083 (78)   |        |          | 4818 (83.9) | 653 (72.5) |       |          |

272 \*Significant at  $p < 0.05$ , \*\*Significant at  $p < 0.001$ .

273 Females showed a higher prevalence of insomnia than males. SES significantly influence  
274 insomnia, with higher rates in low and middle income compared to high income individuals.  
275 Exposure to traumatic events further delineated the complexity of the relationship between  
276 insomnia and trauma, as individuals reported direct attack, including physical assaults, shooting,  
277 bombings, kidnapping or torture, demonstrate markedly elevated prevalence of insomnia.  
278 Similarly, those who experienced destruction or loss of property, or witnessed violence against  
279 others showed increased rates of insomnia symptoms.

280 The logistical regression model for Insomnia (Table 6) was statistically significant for  $\chi^2(17) =$   
 281 536.1,  $p < 0.001$ , and it explained 10.5% Nagelkerke R<sup>2</sup> of the variance, classifying 63.5% of cases,  
 282 at a specificity of 81.3% and sensitivity of 37%, and with a positive predictive value 65.5% of and  
 283 negative predictive value of 57.5%.

284 The most significant, impactful predictive factors are the following, in descending order: low SES  
 285 (OR: 2.15), living with friends and colleagues (OR: 1.77), being female (OR: 1.7), witnessing  
 286 violence against others (OR: 1.53), loss or destruction of property (OR: 1.46), and suffering direct  
 287 assaults (OR: 1.22).

288 **Table 6. Binomial logistical regression model predicting the likelihood for Insomnia and**  
 289 **PTSD symptoms based on the study characteristics.**

| Independent Variables       | Dependent variable: Insomnia |                      |       |          | Dependent variable: PTSD |                      |       |          |
|-----------------------------|------------------------------|----------------------|-------|----------|--------------------------|----------------------|-------|----------|
|                             | Odds ratio                   | 95% CI of odds ratio |       | p-value  | Odds ratio               | 95% CI of odds ratio |       | p-value  |
|                             |                              | Lower                | Upper |          |                          | Lower                | Upper |          |
| <b>Age</b>                  | 1.03                         | 1.01                 | 1.06  | 0.008*   | 1.04                     | 1.01                 | 1.08  | 0.009*   |
| <b>Gender</b>               |                              |                      |       |          |                          |                      |       |          |
| Male                        | Reference                    |                      |       |          | Reference                |                      |       |          |
| Female                      | 1.7                          | 1.52                 | 1.9   | <0.001** | 2.08                     | 1.75                 | 2.46  | <0.001** |
| <b>Socioeconomic status</b> |                              |                      |       |          |                          |                      |       |          |
| Low-income                  | 2.15                         | 1.72                 | 2.7   | <0.001** | 1.49                     | 1.07                 | 2.1   | 0.01*    |
| Middle-income               | 1.48                         | 1.21                 | 1.82  | <0.001** | 1.01                     | 0.73                 | 1.38  | 0.97     |
| High-income                 | Reference                    |                      |       |          | Reference                |                      |       |          |
| <b>Level of Education</b>   |                              |                      |       |          |                          |                      |       |          |
| Pre-clinical year           | Reference                    |                      |       |          | Reference                |                      |       |          |
| Clinical year               | 0.91                         | 0.79                 | 1.04  | 0.19     | 0.91                     | 0.76                 | 1.11  | 0.38     |
| Internship                  | 0.97                         | 0.81                 | 1.16  | 0.79     | 0.75                     | 0.59                 | 0.97  | 0.03*    |
| <b>Living arrangement</b>   |                              |                      |       |          |                          |                      |       |          |

|                                                                                           |           |      |      |          |           |      |      |          |
|-------------------------------------------------------------------------------------------|-----------|------|------|----------|-----------|------|------|----------|
| With family                                                                               | Reference |      |      |          | Reference |      |      |          |
| With friends and colleagues                                                               | 1.77      | 1.42 | 2.20 | <0.001** | 1.31      | 1.01 | 1.71 | 0.04*    |
| Alone                                                                                     | 1.26      | 0.91 | 1.76 | 0.16     | 1.1       | 0.72 | 1.67 | 0.65     |
| <b>Displacement</b>                                                                       |           |      |      |          |           |      |      |          |
| Non-displaced                                                                             | Reference |      |      |          | Reference |      |      |          |
| Displaced                                                                                 | 1.43      | 1.27 | 1.61 | <0.001** | 1.08      | 0.91 | 1.29 | 0.36     |
| <b>Living in conflict zone</b>                                                            |           |      |      |          |           |      |      |          |
| No                                                                                        | Reference |      |      |          | Reference |      |      |          |
| Yes                                                                                       | 1.19      | 1.02 | 1.39 | 0.02*    | 1.15      | 0.94 | 1.4  | 0.15     |
| <b>Injury Exposure</b>                                                                    |           |      |      |          |           |      |      |          |
| No                                                                                        | Reference |      |      |          | Reference |      |      |          |
| Yes                                                                                       | 1.34      | 1.18 | 1.51 | <0.001** | 1.02      | 0.85 | 1.21 | 0.82     |
| <b>Death exposure</b>                                                                     |           |      |      |          |           |      |      |          |
| No                                                                                        | Reference |      |      |          | Reference |      |      |          |
| Yes                                                                                       | 1.28      | 1.12 | 1.46 | <0.001** | 1.5       | 1.25 | 1.79 | <0.001** |
| <b>Direct attacks, such as physical assaults, bombings, shootings, kidnap, or torture</b> |           |      |      |          |           |      |      |          |
| No                                                                                        | Reference |      |      |          | Reference |      |      |          |
| Yes                                                                                       | 1.22      | 1.05 | 1.42 | 0.007*   | 1.38      | 1.14 | 1.66 | <0.001** |
| <b>Experiencing destruction or loss of property</b>                                       |           |      |      |          |           |      |      |          |
| No                                                                                        | Reference |      |      |          | Reference |      |      |          |
| Yes                                                                                       | 1.46      | 1.12 | 1.66 | <0.001** | 1.47      | 1.25 | 1.73 | <0.001** |
| <b>Gender-specific violence</b>                                                           |           |      |      |          |           |      |      |          |
| No                                                                                        | Reference |      |      |          | Reference |      |      |          |
| Yes                                                                                       | 1.34      | 0.99 | 1.82 | 0.05     | 0.80      | 0.56 | 1.13 | 0.21     |
| <b>Rape or sexual violence</b>                                                            |           |      |      |          |           |      |      |          |
| No                                                                                        | Reference |      |      |          | Reference |      |      |          |
| Yes                                                                                       | 1.12      | 0.61 | 2.09 | 0.71     | 1.3       | 0.72 | 2.34 | 0.37     |
| <b>Witnessing violence against others</b>                                                 |           |      |      |          |           |      |      |          |

|     |           |      |     |          |           |      |      |          |
|-----|-----------|------|-----|----------|-----------|------|------|----------|
| No  | Reference |      |     |          | Reference |      |      |          |
| Yes | 1.53      | 1.31 | 1.8 | <0.001** | 1.49      | 1.23 | 1.79 | <0.001** |

290 \*Significant at  $p < 0.05$ , \*\*Significant at  $p < 0.001$ .

291 PTSD symptoms were assessed with the ITQ questionnaire, and in total (Table 2), we found 2651  
 292 (39.9%) of the respondents fulfilled the criteria for Avoidance symptoms, 2251 (33.9%) for  
 293 Reexperience, 3026 (45.6%) for the sense of current threat, 3670 (55.3) for Functional impairment,  
 294 and finally, 901 (13.6%) fulfilled all four criteria for PTSD. Subsequent analysis showed  
 295 significant association between PTSD and some study variables (Table 6). Gender differences  
 296 were evident as females demonstrating a higher prevalence of PTSD than males. SES significantly  
 297 influenced PTSD, with higher rate in low income compared to high income individuals. exposure  
 298 to death, as well as exposure violence against others, were linked to higher rates of PTSD.

299 The logistical regression model for PTSD (Table 6) was statistically significant for  $\chi^2(17) =$   
 300 247.814,  $p < 0.001$ , and it explained 6.7% Nagelkerke  $R^2$  of the variance, classifying 81.9% of  
 301 cases, at a sensitivity of 23.2% and specificity of 91.1%, and with a positive predictive value 28.9%  
 302 of and negative predictive value of 88.3%.

303 The most significant, impactful predictive factors are the following, in descending order: being  
 304 female (OR: 2.08), exposure to death (OR: 1.5), Low SES and witnessing violence against others  
 305 (OR: 1.49), destruction or loss of property (OR: 1.47),

306 When comparing the median (IQR) level of depression, anxiety, and insomnia (Table 1) between  
 307 the respondents' gender, females have significantly higher median score (IQR) for depression in  
 308 comparison to males (12 [8-18] Vs. 9 [5-16];  $p < 0.001$ ), and the same applies to anxiety (9 [5-15]  
 309 vs. 7 [3-13];  $p < 0.001$ ), and insomnia (7 [4-12] vs. 6 [3-11];  $p < 0.001$ ). Likewise, participants who  
 310 have low income compared to middle and high income have significantly higher median scores



311 (ITQ) for depression (13[8-19] vs.10[6-16] vs. 8[4-15];  $p < 0.001$ ), at also applies to anxiety and  
312 insomnia scores.

313 Those living with family fared better than those who lived with friends, who in turn fared better  
314 than those who lived alone regarding depression, 11 (7-17) Vs. 12 (8-18) Vs. 13 (8-20) respectively  
315 ( $p < 0.001$ ), and the same applied to Anxiety, 8 (4-14) Vs. 9 (6-15) Vs. 11 (6-16) respectively  
316 ( $p < 0.001$ ), and insomnia, 7 (4-11) Vs. 8 (5-13) Vs. 9 (4-14) respectively ( $p < 0.001$ ). Those who  
317 were not displaced tended to fare better than those who were internally displaced, which in turn  
318 fared better than those externally displaced, 10 (6-16) Vs. 11 (7-17) Vs. 12 (7-18) ( $p < 0.001$ )  
319 regarding depression, and 7 (3-13) Vs. 9 (5-14) Vs. 9 (5-14) ( $p < 0.001$ ) regarding Anxiety, and 6  
320 (3-9) Vs. 7 (4-11) Vs. 8 (4-12) ( $p < 0.001$ ) regarding insomnia, respectively. The same trend goes  
321 for those in conflict zones Vs. outside of conflict zones: 12 (8-18) Vs. 11 (7-17) ( $p = 0.005$ ),  
322 respectively.

323 The relationship of these with age was a bit distinct, with all categories sharing similar levels of  
324 anxiety and giving us statistically insignificant results 8 (4-14), but those younger ( $< 21$ ) faring  
325 better than those older ( $\geq 21$ ) regarding depression (10 (6-16) Vs. 11 (7-17) ( $p < 0.001^{**}$ ), and  
326 regarding insomnia 7 (3-11) for  $< 21$  years old, 7 (4-11) for 21-24 years old, and 8 (4-13) for  $> 24$   
327 years old,  $p < 0.001$ .

328 Current level of education was also distinct in that it showed those earlier in their university  
329 education to suffer better than those who are in their clinical years and those who are interns  
330 regarding depression (11 (7-17) Vs. 11 (7-17) Vs. 11 (7-18), respectively,  $p = 0.007^*$ ) and regarding  
331 insomnia 7 (3-11) Vs. 7 (4-11) Vs. 8 (4-13), respectively,  $p < 0.001^{**}$ ), but no statistically  
332 significant difference was found regarding anxiety.

### 333 **Correlations Between Mental health parameters**

334 A correlation analysis between mental health parameters was conducted, revealing numerous  
 335 independent associations among them as shown in the (Table 7). There were statistically  
 336 significant correlations between all scales in addition to significant correlations with the age of  
 337 participants, level of education, number of events, current SES level, and SES changes. A higher  
 338 level of depression (measured with the PHQ-9 scale) was associated with a strong positive  
 339 correlation between both anxiety and insomnia symptoms (as indicated by scores on the GAD-7  
 340 and AIS-8 scales),  $r(6639) = 0.68-0.76$ ,  $p < 0.001$ , this also applies to the other combinations of  
 341 the scores concerned. In addition, there was a significant positive weak correlation between the  
 342 age of participants and their level of education, with PHQ-9, GAD-7, and AIS-8 scores, suggesting  
 343 that, as the age of participants increases and as their level of education advances, there is a  
 344 concomitant increase in severity of symptoms. However, there was a significant association  
 345 between SES and the change to SES, and various mental health and sleep parameters, as a negative  
 346 correlation exists with PHQ-9, AIS-8, and GAD-7. Indicating that a low and deteriorating income  
 347 corresponds to a higher level of depression, anxiety, and insomnia symptoms.

348 **Table 7. Correlations Between Mental health parameters.**

|                    | PHQ-9 score | GAD-7 score | AIS-8 score | NO of events | Age      | Level of education | Current SES | SES change |
|--------------------|-------------|-------------|-------------|--------------|----------|--------------------|-------------|------------|
| <b>PHQ-9 score</b> |             |             |             |              |          |                    |             |            |
| (r)                | 1           | 0.769       | 0.68        | 0.223        | 0.048    | 0.040              | -0.176      | -0.128     |
| p-value            |             | <0.001**    | <0.001**    | <0.001**     | <0.001** | 0.001*             | <0.001**    | <0.001**   |
| <b>GAD-7 score</b> |             |             |             |              |          |                    |             |            |
| (r)                | 0.769       | 1           | 0.692       | 0.232        | 0.023    | 0.018              | -0.158      | -0.118     |
| p-value            | <0.001**    |             | <0.001**    | <0.001**     | 0.06     | 0.14               | <0.001**    | <0.001**   |

|                    |          |          |   |          |          |          |          |          |
|--------------------|----------|----------|---|----------|----------|----------|----------|----------|
| <b>AIS-8 score</b> |          |          |   |          |          |          |          |          |
| (r)                | 0.680    | 0.692    | 1 | 0.248    | 0.067    | 0.061    | -0.162   | -0.112   |
| <i>p</i> -value    | <0.001** | <0.001** |   | <0.001** | <0.001** | <0.001** | <0.001** | <0.001** |

349 (r) Spearman correlation coefficient, \*Significant at  $p < 0.05$ , \*\*Significant at  $p < 0.001$ .

## 350 Discussion

351 We choose to leave our personal experience of two civil wars aside for now to maintain the  
 352 objectivity of this paper. We will discuss our findings regarding the data we collected and others  
 353 already available – though minimal in this specific context. We want to stress that those we reached  
 354 are those on the better side of things: those with infrastructure stable enough for some 20 minutes  
 355 to respond to our survey, and the means and the hope to bother at all, which effectively means that  
 356 what we’ve managed to touch upon is merely the tip of the miserable, depressing iceberg of  
 357 bloodshed and psychological trauma, and that those in the most desperate need were simply  
 358 beyond our reach at all, despite our best efforts, and more targeted approaches must be employed  
 359 in the field, hands on, by organizations with the resources to mobilize. War is war, and hell is hell,  
 360 and of the two war is by far the worse, as was once said.

361 The purpose of this paper is to observe the prevalence of specific, morbid mental health disorders  
 362 during the civil war in Sudan of April 2023. In war, it is expected to see a negative impact as the  
 363 rule due to all the savagery innate to it, the bloodshed, and the upheaval, and the factors associated  
 364 are myriad, of which we’d chosen a few.

365 We find remarkable prevalences of psychopathologies in our sample as expected during wartimes;  
 366 our findings are concurrent with others considering the context for the most part, despite the  
 367 deficiency regarding medical students. This study aimed to have a considerable sample size to  
 368 enhance its statistical power and allow for representation for the multitudes within Sudan and their

369 diverse backgrounds best as possible, as Sudan is a huge country in every regard, geographically,  
370 ethnically, and as a destination for those seeking education including medical students.

371 For depression, the findings in the recent metanalysis by Lim et al [39] of 57 studies done in 2022  
372 show an aggregate prevalence of 28.9 % for depression Vs. our 33.7%. Anxiety had an aggregate  
373 of 30.7% Vs. our finding of 22.4%, and PTSD at 23.5% Vs. our 13.6%. other studies like that of  
374 Elhadi from the Libyan civil war [23] showed a prevalence of depression at 21.6%, both far less  
375 than in that conducted in Syria by Al Saadi at 60.6% [40], with a significant impact of financial  
376 security in that study. A study in Iraq had a prevalence more similar to the one in Syria at 52.1%,  
377 while anxiety had a prevalence of 62.5% [41].

378 Insomnia is a point-source for complications on both psychological and physiological levels [42],  
379 both immediately and in the future, and we find a prevalence of 11.5% of moderate and severe  
380 insomnia Vs. 49% from the recent paper from Pavlova et al. regarding Ukraine's ongoing war  
381 [43].

382 These findings are to be expected considering the impact of a devastating, destabilizing civil war  
383 [44, 45]. Little attention, however, is aimed at the population of medical students during wartime  
384 despite being one of the core, most desperately needed forces to support the recovery and  
385 stabilization of a scarred society and the health of civilization both during and after wars, and  
386 despite them being a vulnerable population even during peacetime, both locally and globally [46].  
387 Suicidal ideation had a disconcerting prevalence in our sample, with a figure that's more severe  
388 than that found in US Veterans [47], and the general population (23%) [48], but less than the  
389 findings in Libya during their civil war at 22.7% [23]. The specific causes of such differences are  
390 a challenge to ascertain.

391 Regarding depression, those most severely afflicted are those aged 21-24 years old in our sample,  
392 likely reflecting their concerns regarding the upheaval in their lives both present and future, as  
393 well as their overall vulnerability as an age group, and the radical disruption to their image of  
394 themselves rooted in their plans.

395 Females tended to suffer the worst from all psychopathologies we'd considered as a well-known  
396 vulnerable population, we find higher prevalences across the board [49-52], as did suffering a  
397 significant SES disadvantage. These findings are well in line with others in the same vein [53-56],  
398 and Sudanese women are known to struggle with the demands of life in this developing country.

399 Living alone tended towards negative outcomes as expected [57-60], since living alone is a full-  
400 blown health risk where loneliness impacts negatively both the physiological and psychological  
401 health but also itself is caused by challenges to health and wellbeing. It suffices to point out that  
402 isolation is a method of torture used to break the psyche to illustrate the severity of such a casual  
403 epidemic during times of war, yet our findings were of significant AOR for Anxiety and  
404 Depression but not Insomnia and PTSD.

405 Being displaced seems to be a risk factor for all four conditions being considered, and our findings  
406 concur with the norm [43, 61, 62]. Being displaced results in thorough destabilization of all aspects  
407 of life and is akin to exposure, it results in vulnerabilities that may have been inconceivable before  
408 like having no access to basic facilities or infrastructure, very poor hygiene and subsequent  
409 epidemics, loss of livelihood and living standards, loss of connections and support networks, all  
410 while struggling in the face of stigma and resentment.

411 Material losses were also found to be a risk for all conditions considered, likely due to the reliance  
412 on what's lost, and therefore losing all that's dependent on what's lost, e.g., Loss of privacy and

413 security in the case of losing one's home, loss of independence and flexibility, loss of status, loss  
414 of the means of production, and so on. It is no wonder that such losses are so impactful, and further  
415 insight should help alleviate the damage done by such losses, aiding in restoring health and wealth  
416 all the same, encouraging independence and production, and restoring a sense of meaning and  
417 belonging.

418 Living in conflict zones showed an increased AOR for Insomnia in concurrence with Pavlova's  
419 findings [43], but we found no significant increase to depression, Anxiety, and PTSD, in contrast  
420 to findings in other studies [5, 43, 63]. This is perhaps best explained by the maintenance of social  
421 networks and the security of the familiar, preserving a sense of belonging and meaning, even under  
422 the threat of death.

423 Experiencing death of contacts is a well-recognized cause of depression, anxiety, PTSD, and  
424 insomnia [64-67], and our findings concur: death of contacts increased the AOR for all considered  
425 psychopathologies. These may be attributed to several consequences that include losing caretakers  
426 and providers both materially and emotionally, the loss of one's connection to the past, to the  
427 future, and to the world, as well as being forced to face one's mortality directly and abruptly under  
428 such distress.

429 Witnessing violence also resulted in an increase in negative outcomes for all four outcomes, but  
430 to lesser degree than experiencing trauma to contacts, or to the self, a relationship that caught us  
431 off guard. The same also applies to gender-specific violence, which is a well-recognized cause of  
432 trauma and impacts different identities uniquely by definition [5, 68]. Our findings regarding GSV  
433 were as expected for depression, Anxiety, and Insomnia: GSV increases the AOR. Oddly, we find  
434 no significant increase in the AOR for PTSD in contrast to other studies [69, 70]. This is concurrent  
435 with our finding that rape does not significantly increase the AOR for PTSD. After discussions

436 regarding such findings, these are likely to be attributable to the circumstances and nature of rape  
437 and GSV, where those most severely impacted and afflicted were simply beyond our reach to begin  
438 with, meaning that this specific finding signifies a darker outcome we could not access below the  
439 waterline. These transgressions and war crimes are commonplace tactics in war, and we'd already  
440 had reports of rape, kidnap, and murder in Sudan even before the outbreak of the current war. We  
441 can only hope our line of thinking is entirely and thoroughly mistaken despite the evidence.

442 The level of education (Preclinical, Clinical, Internship) did not impact significantly the AOR for  
443 the considered psychopathologies in our samples.

#### 444 **Limitations and author statements**

445 This is a study provoked by our own experience during not one, but two civil wars and we have  
446 chosen the factors considered accordingly. We have seen death and got acquainted with it in savage  
447 ways, and I have personally seen men bleed to death over the course of hours with not even so  
448 much as adequate analgesia, among other, oddly less pleasant experiences of kidnap and torture,  
449 yet here we are again. We have suffered a great blow to our current and future lives, been displaced,  
450 been robbed, assaulted, kidnapped, and tortured, and we have seen our own students suffering the  
451 same as we did. Our neighbors. Our colleagues. We feel abandoned by society at large, persecuted  
452 even, accused, at times, both locally and globally. We plead for help building our livelihoods and  
453 future, to stand on our own, and thus we cry with cold, hard statistics. Our suffering is great, and  
454 it will echo throughout our lives and beyond, we only ask that we be helped get back on track  
455 while we pull ourselves from the ashes of our previous lives before all belligerence and  
456 unjustifiable deaths and loss and pain. We merely ask that we be helped to build better and do  
457 better and welcomed to do just that.

458 We are also acutely aware of the fact that we could not reach those who most desperately needed  
459 to be reached, those whose living conditions are so dire they have no electricity or  
460 communications, those who had suffered material losses that prevent their participation, those so  
461 depressed and traumatized they wouldn't care to respond if even they could. we can only this helps  
462 them anyway reconnect to the world and move on with their lives, as our pleas are heard. That  
463 many are below the waterline, drowning and drowned, is a nightmare we cannot possibly stress  
464 enough, if only we could know how bad things truly are.

465 We would also like to note that we had originally set out to study the impact of gender as a factor,  
466 but then were faced with extreme backlash for considering such, and I quote, "Western degeneracy  
467 that no self-respecting Man (Capital M) would consider" and had subsequently had to omit such  
468 an important factor/group. We hope to repeat our study down the line, and we plan then to inquire  
469 about gender.

470 This study also considered especially medical students and fresh graduates, and perhaps our  
471 findings apply to similar groups, however, that is beyond our scope.

## 472 **Conclusion**

473 War is strongly condemned in the modern world, and its impacts are myriad and thoroughly  
474 negative bar the most unusual views. We find a great deal of suffering in our population, and our  
475 study highlights the fact by observing the prevalence of four psychological disorders in the  
476 population of medical students and fresh medical graduates who suffered the war in Sudan. The  
477 negative aspects are reasonable and consistent for the most part with what's to be expected: losing  
478 one's place in society and society itself, losing one's contacts and property, and being injured



479 physically and transgressed against are all harmful with lasting effects on the persons involved,  
480 and observing such results would be instrumental for effective management of sequelae.

## 481 **Recommendations**

482 Our recommendations regarding our findings are in line with those of the UN, and we find it  
483 reasonable considering our findings: those left without an established life in the present and in the  
484 future are prone to manifestations of psychological distress including depression, anxiety, PTSD,  
485 and insomnia.

486 To boot, that the globe has such a need for doctors, current and future, everywhere, in every  
487 specialty, yet so willingly discards such huge numbers teeters towards unfathomable cruelty to all  
488 stakeholders and totters towards being a poor punchline to a joke that's all a punch to the gut,  
489 though rarely it makes contact as it did during the years of COVID-19.

490 What we plead for is a way for the survivors to reestablish their lives and carry on, and having a  
491 career is an essential aspect of that, a career that starts with a completed education, conserves  
492 dignity, permits integration, facilitates ascendancy, and inspires sublimation. Many of us survivors  
493 can go on with minimal aid: simply provide the examination centers and be willing to help us  
494 reintegrate into the medical pipeline, especially those on the verge of graduation/recent graduates  
495 as they suffer the most profound losses on par with mutilation, require the least support: are you  
496 on par with others as you claim? and are the most rewarding: we now have another desperately  
497 needed practitioner! The available research supports that point beyond doubt, and yet here we are,  
498 having to go through hundreds of thousands for a sample of a few thousands to state the obvious,  
499 a dead horse that for some reason we are still savagely and relentlessly flogging...

500 And for those who welcomed our efforts and rushed to our aid; we owe you a debt of gratitude  
501 long as we may live as physicians doing what we can, where we can.

502

## 503 **Conflict of interest**

504 We declare that our work was conducted with no commercial or financial relationships that could  
505 possibly constitute any conflict of interests.

## 506 **Acknowledgment**

507 We would like to express our gratitude to all those who contributed to this work.

508

509

510

511

512

513

514

515

516

517

518

## 519 **References**

- 520 1. Khalid Abdelaziz NE. Sudan clashes kill at least 25 in power struggle between army, paramilitaries:  
521 Reuters; 2023 [cited 2023]. Available from: [https://www.reuters.com/world/africa/heavy-gunfire-heard-](https://www.reuters.com/world/africa/heavy-gunfire-heard-south-sudanese-capital-khartoum-witnesses-2023-04-15/)  
522 [south-sudanese-capital-khartoum-witnesses-2023-04-15/](https://www.reuters.com/world/africa/heavy-gunfire-heard-south-sudanese-capital-khartoum-witnesses-2023-04-15/).
- 523 2. Migration IOF. DTM Sudan's Internally Displaced Persons 2023 Estimates | Displacement Tracking  
524 Matrix 2024. Available from: [https://dtm.iom.int/reports/dtm-sudans-internally-displaced-persons-2023-](https://dtm.iom.int/reports/dtm-sudans-internally-displaced-persons-2023-estimates)  
525 [estimates](https://dtm.iom.int/reports/dtm-sudans-internally-displaced-persons-2023-estimates).
- 526 3. Elshazali OH, Abdullahi H, Karrar ZA. Progress, challenges and partnerships of teaching medical  
527 professionalism in medical schools in Sudan: the success story of Sudan Medical Council. *Sudan J Paediatr*.  
528 2021;21(2):110-5. Epub 2021/01/01. doi: 10.24911/sjp.106-1622725530. PubMed PMID: 35221421;  
529 PubMed Central PMCID: PMCPMC8879352.
- 530 4. Sudan Country Profile 2023. Available from: <https://www.bbc.com/news/world-africa-14094995>.
- 531 5. Murthy RS, Lakshminarayana R. Mental health consequences of war: a brief review of research  
532 findings. *World Psychiatry*. 2006;5(1):25-30. PubMed PMID: 16757987; PubMed Central PMCID:  
533 PMCPMC1472271.
- 534 6. Cardozo BL, Bilukha OO, Crawford CA, Shaikh I, Wolfe MI, Gerber ML, et al. Mental health, social  
535 functioning, and disability in postwar Afghanistan. *JAMA*. 2004;292(5):575-84. doi:  
536 10.1001/jama.292.5.575. PubMed PMID: 15292083.
- 537 7. Scholte WF, Olf M, Ventevogel P, de Vries GJ, Jansveld E, Cardozo BL, et al. Mental health  
538 symptoms following war and repression in eastern Afghanistan. *JAMA*. 2004;292(5):585-93. doi:  
539 10.1001/jama.292.5.585. PubMed PMID: 15292084.
- 540 8. Di Giovanni J. *Madness visible: a memoir of war*: Vintage; 2007.
- 541 9. Rose M. *Fighting for peace, Bosnia 1994*: Vintage; 1998.
- 542 10. Beloff N. *Yugoslavia: an avoidable war*: New European Publications; 1997.
- 543 11. Westermeyer J. Health of Albanians and Serbians following the war in Kosovo: studying the  
544 survivors of both sides of armed conflict. *JAMA*. 2000;284(5):615-6. doi: 10.1001/jama.284.5.615.  
545 PubMed PMID: 10918709.
- 546 12. Lopes Cardozo B, Vergara A, Agani F, Gotway CA. Mental health, social functioning, and attitudes  
547 of Kosovar Albanians following the war in Kosovo. *JAMA*. 2000;284(5):569-77. doi:  
548 10.1001/jama.284.5.569. PubMed PMID: 10918702.
- 549 13. Salama P, Spiegel P, Van Dyke M, Phelps L, Wilkinson C. Mental health and nutritional status  
550 among the adult Serbian minority in Kosovo. *JAMA*. 2000;284(5):578-84. doi: 10.1001/jama.284.5.578.  
551 PubMed PMID: 10918703.
- 552 14. Boehnlein JK, Kinzie JD, Sekiya U, Riley C, Pou K, Rosborough B. A ten-year treatment outcome  
553 study of traumatized Cambodian refugees. *J Nerv Ment Dis*. 2004;192(10):658-63. doi:  
554 10.1097/01.nmd.0000142033.79043.9d. PubMed PMID: 15457108.
- 555 15. Mollica RF, Donelan K, Tor S, Lavelle J, Elias C, Frankel M, et al. The effect of trauma and  
556 confinement on functional health and mental health status of Cambodians living in Thailand-Cambodia  
557 border camps. *JAMA*. 1993;270(5):581-6. PubMed PMID: 8331755.
- 558 16. Ahmad A, Sofi MA, Sundelin-Wahlsten V, von Knorring AL. Posttraumatic stress disorder in  
559 children after the military operation "Anfal" in Iraqi Kurdistan. *Eur Child Adolesc Psychiatry*.  
560 2000;9(4):235-43. doi: 10.1007/s007870070026. PubMed PMID: 11202098.

- 561 17. Karam EG, Howard DB, Karam AN, Ashkar A, Shaaya M, Melhem N, et al. Major depression and  
562 external stressors: the Lebanon Wars. *Eur Arch Psychiatry Clin Neurosci*. 1998;248(5):225-30. doi:  
563 10.1007/s004060050042. PubMed PMID: 9840368.
- 564 18. Kinzie JD, Sack W, Angell R, Clarke G, Ben R. A three-year follow-up of Cambodian young people  
565 traumatized as children. *J Am Acad Child Adolesc Psychiatry*. 1989;28(4):501-4. doi: 10.1097/00004583-  
566 198907000-00006. PubMed PMID: 2768143.
- 567 19. Paardekooper B, de Jong JT, Hermanns JM. The psychological impact of war and the refugee  
568 situation on South Sudanese children in refugee camps in Northern Uganda: an exploratory study. *J Child*  
569 *Psychol Psychiatry*. 1999;40(4):529-36. PubMed PMID: 10357160.
- 570 20. Al-Krenawi A, Graham JR, Sehwal MA. Mental Health and Violence/Trauma in Palestine:  
571 Implications for Helping Professional Practice. *Journal of Comparative Family Studies*. 2004;35(2):185-209.
- 572 21. de Jong JT, Komproe IH, Van Ommeren M, El Masri M, Araya M, Khaled N, et al. Lifetime events  
573 and posttraumatic stress disorder in 4 postconflict settings. *JAMA*. 2001;286(5):555-62. doi:  
574 10.1001/jama.286.5.555. PubMed PMID: 11476657.
- 575 22. Kurapov A, Danyliuk I, Loboda A, Kalaitzaki A, Kowatsch T, Klimash T, et al. Six months into the  
576 war: a first-wave study of stress, anxiety, and depression among in Ukraine. *Frontiers in Psychiatry*.  
577 2023;14. doi: 10.3389/fpsy.2023.1190465.
- 578 23. Elhadi M, Buzreg A, Bouhuwaish A, Khaled A, Alhadi A, Msherghi A, et al. Psychological Impact of  
579 the Civil War and COVID-19 on Libyan Medical Students: A Cross-Sectional Study. *Front Psychol*.  
580 2020;11:570435. Epub 20201026. doi: 10.3389/fpsyg.2020.570435. PubMed PMID: 33192858; PubMed  
581 Central PMCID: PMC7649391.
- 582 24. Mohamed OGN, Mohamed EGN, Ahmed R, Aburas L, Ali M, Hamdan HZ. Depression, Anxiety, and  
583 Stress among Sudanese Medical Students during the COVID-19 Lockdown Period. *Open Access*  
584 *Macedonian Journal of Medical Sciences*. 2022;10(B):1365-71. doi: 10.3889/oamjms.2022.9432.
- 585 25. Levis B, Benedetti A, Thombs BD. Accuracy of Patient Health Questionnaire-9 (PHQ-9) for  
586 screening to detect major depression: individual participant data meta-analysis. *Bmj*. 2019;365:l1476.  
587 Epub 2019/04/11. doi: 10.1136/bmj.l1476. PubMed PMID: 30967483; PubMed Central PMCID:  
588 PMC6454318 at [www.icmje.org/coi\\_disclosure.pdf](http://www.icmje.org/coi_disclosure.pdf) (available on request from the corresponding  
589 author)
- 590 26. AlHadi AN, AlAteeq DA, Al-Sharif E, Bawazeer HM, Alanazi H, AlShomrani AT, et al. An arabic  
591 translation, reliability, and validation of Patient Health Questionnaire in a Saudi sample. *Ann Gen*  
592 *Psychiatry*. 2017;16:32. Epub 2017/09/08. doi: 10.1186/s12991-017-0155-1. PubMed PMID: 28878812;  
593 PubMed Central PMCID: PMC5585978.
- 594 27. Kroenke K, Spitzer RL, Williams JB. The PHQ-9: validity of a brief depression severity measure. *J*  
595 *Gen Intern Med*. 2001;16(9):606-13. Epub 2001/09/15. doi: 10.1046/j.1525-1497.2001.016009606.x.  
596 PubMed PMID: 11556941; PubMed Central PMCID: PMC1495268.
- 597 28. Urtasun M, Daray FM, Teti GL, Coppolillo F, Herlax G, Saba G, et al. Validation and calibration of  
598 the patient health questionnaire (PHQ-9) in Argentina. *BMC Psychiatry*. 2019;19(1):291. Epub  
599 2019/09/20. doi: 10.1186/s12888-019-2262-9. PubMed PMID: 31533674; PubMed Central PMCID:  
600 PMC6751851.
- 601 29. Cloitre M, Shevlin M, Brewin CR, Bisson JI, Roberts NP, Maercker A, et al. The International Trauma  
602 Questionnaire: development of a self-report measure of ICD-11 PTSD and complex PTSD. *Acta Psychiatr*  
603 *Scand*. 2018;138(6):536-46. Epub 2018/09/05. doi: 10.1111/acps.12956. PubMed PMID: 30178492.
- 604 30. Hyland P, Shevlin M, Brewin CR, Cloitre M, Downes AJ, Jumbe S, et al. Validation of post-traumatic  
605 stress disorder (PTSD) and complex PTSD using the International Trauma Questionnaire. *Acta Psychiatr*  
606 *Scand*. 2017;136(3):313-22. Epub 2017/07/12. doi: 10.1111/acps.12771. PubMed PMID: 28696531.
- 607 31. Vallières F, Ceannt R, Daccache F, Abou Daher R, Sleiman J, Gilmore B, et al. ICD-11 PTSD and  
608 complex PTSD amongst Syrian refugees in Lebanon: the factor structure and the clinical utility of the

- 609 International Trauma Questionnaire. *Acta Psychiatrica Scandinavica*. 2018;138(6):547-57. doi:  
610 <https://doi.org/10.1111/acps.12973>.
- 611 32. Spitzer RL, Kroenke K, Williams JBW, Löwe B. A Brief Measure for Assessing Generalized Anxiety  
612 Disorder: The GAD-7. *Archives of Internal Medicine*. 2006;166(10):1092-7. doi:  
613 10.1001/archinte.166.10.1092.
- 614 33. Löwe B, Decker O, Müller S, Brähler E, Schellberg D, Herzog W, et al. Validation and  
615 standardization of the Generalized Anxiety Disorder Screener (GAD-7) in the general population. *Med  
616 Care*. 2008;46(3):266-74. Epub 2008/04/05. doi: 10.1097/MLR.0b013e318160d093. PubMed PMID:  
617 18388841.
- 618 34. Ruiz MA, Zamorano E, García-Campayo J, Pardo A, Freire O, Rejas J. Validity of the GAD-7 scale as  
619 an outcome measure of disability in patients with generalized anxiety disorders in primary care. *J Affect  
620 Disord*. 2011;128(3):277-86. Epub 2010/08/10. doi: 10.1016/j.jad.2010.07.010. PubMed PMID: 20692043.
- 621 35. Kroenke K, Spitzer RL, Williams JB, Monahan PO, Löwe B. Anxiety disorders in primary care:  
622 prevalence, impairment, comorbidity, and detection. *Ann Intern Med*. 2007;146(5):317-25. Epub  
623 2007/03/07. doi: 10.7326/0003-4819-146-5-200703060-00004. PubMed PMID: 17339617.
- 624 36. Soldatos CR, Dikeos DG, Paparrigopoulos TJ. Athens Insomnia Scale: validation of an instrument  
625 based on ICD-10 criteria. *J Psychosom Res*. 2000;48(6):555-60. Epub 2000/10/18. doi: 10.1016/s0022-  
626 3999(00)00095-7. PubMed PMID: 11033374.
- 627 37. Hallit S, Haddad C, Hallit R, Al Karaki G, Malaeb D, Sacre H, et al. Validation of selected sleeping  
628 disorders related scales in Arabic among the Lebanese Population. *Sleep and Biological Rhythms*.  
629 2019;17(2):183-9. doi: 10.1007/s41105-018-0196-0.
- 630 38. Soldatos CR, Dikeos DG, Paparrigopoulos TJ. The diagnostic validity of the Athens Insomnia Scale.  
631 *J Psychosom Res*. 2003;55(3):263-7. Epub 2003/08/23. doi: 10.1016/s0022-3999(02)00604-9. PubMed  
632 PMID: 12932801.
- 633 39. Lim I, Tam WWS, Chudzicka-Czupala A, McIntyre RS, Teopiz KM, Ho RC, et al. Prevalence of  
634 depression, anxiety and post-traumatic stress in war- and conflict-afflicted areas: A meta-analysis. *Front  
635 Psychiatry*. 2022;13:978703. Epub 20220916. doi: 10.3389/fpsyt.2022.978703. PubMed PMID: 36186881;  
636 PubMed Central PMCID: PMC9524230.
- 637 40. Al Saadi T, Zaher Addeen S, Turk T, Abbas F, Alkhatib M. Psychological distress among medical  
638 students in conflicts: a cross-sectional study from Syria. *BMC Med Educ*. 2017;17(1):173. Epub 20170920.  
639 doi: 10.1186/s12909-017-1012-2. PubMed PMID: 28931387; PubMed Central PMCID: PMC5607487.
- 640 41. Rasheed AG, Hussein AG. Depression, anxiety, and stress among medical students of College of  
641 Medicine, Hawler Medical University, Erbil, Iraq. *Zanco Journal of Medical Sciences (Zanco J Med Sci)*.  
642 2019;23(2):143-52.
- 643 42. Fernandez-Mendoza J, Vgontzas AN. Insomnia and its impact on physical and mental health. *Curr  
644 Psychiatry Rep*. 2013;15(12):418. doi: 10.1007/s11920-013-0418-8. PubMed PMID: 24189774; PubMed  
645 Central PMCID: PMC3972485.
- 646 43. Pavlova I, Rogowska AM. Exposure to war, war nightmares, insomnia, and war-related  
647 posttraumatic stress disorder: A network analysis among university students during the war in Ukraine.  
648 *Journal of Affective Disorders*. 2023;342:148-56. doi: <https://doi.org/10.1016/j.jad.2023.09.003>.
- 649 44. Steel Z, Chey T, Silove D, Marnane C, Bryant RA, van Ommeren M. Association of torture and other  
650 potentially traumatic events with mental health outcomes among populations exposed to mass conflict  
651 and displacement: a systematic review and meta-analysis. *JAMA*. 2009;302(5):537-49. doi:  
652 10.1001/jama.2009.1132. PubMed PMID: 19654388.
- 653 45. Wells TS, Miller SC, Adler AB, Engel CC, Smith TC, Fairbank JA. Mental health impact of the Iraq  
654 and Afghanistan conflicts: a review of US research, service provision, and programmatic responses. *Int  
655 Rev Psychiatry*. 2011;23(2):144-52. doi: 10.3109/09540261.2011.558833. PubMed PMID: 21521083.

- 656 46. Maser B, Danilewitz M, Guerin E, Findlay L, Frank E. Medical Student Psychological Distress and  
657 Mental Illness Relative to the General Population: A Canadian Cross-Sectional Survey. *Acad Med.*  
658 2019;94(11):1781-91. doi: 10.1097/ACM.0000000000002958. PubMed PMID: 31436626.
- 659 47. Nichter B, Stein MB, Norman SB, Hill ML, Straus E, Haller M, et al. Prevalence, Correlates, and  
660 Treatment of Suicidal Behavior in US Military Veterans: Results From the 2019-2020 National Health and  
661 Resilience in Veterans Study. *J Clin Psychiatry.* 2021;82(5). Epub 20210810. doi: 10.4088/JCP.20m13714.  
662 PubMed PMID: 34383391.
- 663 48. Nouri E, Moradi Y, Moradi G. The global prevalence of suicidal ideation and suicide attempts  
664 among men who have sex with men: a systematic review and meta-analysis. *European Journal of Medical*  
665 *Research.* 2023;28(1):361. doi: 10.1186/s40001-023-01338-6.
- 666 49. Weissman MM, Klerman GL. Sex differences and the epidemiology of depression. *Arch Gen*  
667 *Psychiatry.* 1977;34(1):98-111. doi: 10.1001/archpsyc.1977.01770130100011. PubMed PMID: 319772.
- 668 50. Tian-Ci Quek T, Wai-San Tam W, X. Tran B, Zhang M, Zhang Z, Su-Hui Ho C, et al. The Global  
669 Prevalence of Anxiety Among Medical Students: A Meta-Analysis. *International Journal of Environmental*  
670 *Research and Public Health [Internet].* 2019; 16(15).
- 671 51. Ng LC, Stevenson A, Kalapurakkal SS, Hanlon C, Seedat S, Harerimana B, et al. National and  
672 regional prevalence of posttraumatic stress disorder in sub-Saharan Africa: A systematic review and meta-  
673 analysis. *PLOS Medicine.* 2020;17(5):e1003090. doi: 10.1371/journal.pmed.1003090.
- 674 52. Zhang B, Wing Y-K. Sex differences in insomnia: a meta-analysis. *Sleep.* 2006;29(1):85-93.
- 675 53. Lorant V, Deliège D, Eaton W, Robert A, Philippot P, Ansseau M. Socioeconomic Inequalities in  
676 Depression: A Meta-Analysis. *American Journal of Epidemiology.* 2003;157(2):98-112. doi:  
677 10.1093/aje/kwf182.
- 678 54. Barbek RME, Makowski AC, von dem Knesebeck O. Social inequalities in health anxiety: A  
679 systematic review and meta-analysis. *Journal of Psychosomatic Research.* 2022;153:110706. doi:  
680 <https://doi.org/10.1016/j.jpsychores.2021.110706>.
- 681 55. Sosso FAE, Matos E, Papadopoulos D. Social disparities in sleep health of African populations: A  
682 systematic review and meta-analysis of observational studies. *Sleep Health.* 2023;9(6):828-45. doi:  
683 <https://doi.org/10.1016/j.sleh.2023.08.021>.
- 684 56. Brewin CR, Andrews B, Valentine JD. Meta-analysis of risk factors for posttraumatic stress disorder  
685 in trauma-exposed adults. *Journal of consulting and clinical psychology.* 2000;68(5):748.
- 686 57. Wu D, Liu F, Huang S. Assessment of the relationship between living alone and the risk of  
687 depression based on longitudinal studies: A systematic review and meta-analysis. *Front Psychiatry.*  
688 2022;13:954857. Epub 20220830. doi: 10.3389/fpsy.2022.954857. PubMed PMID: 36111305; PubMed  
689 Central PMCID: PMC9468273.
- 690 58. Jacob L, Haro JM, Koyanagi A. Relationship between living alone and common mental disorders in  
691 the 1993, 2000 and 2007 National Psychiatric Morbidity Surveys. *PLOS ONE.* 2019;14(5):e0215182. doi:  
692 10.1371/journal.pone.0215182.
- 693 59. Morina N, Stam K, Pollet TV, Priebe S. Prevalence of depression and posttraumatic stress disorder  
694 in adult civilian survivors of war who stay in war-afflicted regions. A systematic review and meta-analysis  
695 of epidemiological studies. *Journal of Affective Disorders.* 2018;239:328-38. doi:  
696 <https://doi.org/10.1016/j.jad.2018.07.027>.
- 697 60. Hom MA, Chu C, Rogers ML, Joiner TE. A Meta-Analysis of the Relationship Between Sleep  
698 Problems and Loneliness. *Clinical Psychological Science.* 2020;8(5):799-824. doi:  
699 10.1177/2167702620922969.
- 700 61. Bedaso A, Duko B. Epidemiology of depression among displaced people: A systematic review and  
701 meta-analysis. *Psychiatry Res.* 2022;311:114493. Epub 20220308. doi: 10.1016/j.psychres.2022.114493.  
702 PubMed PMID: 35316692.

- 703 62. Oakley LD, Kuo W-c, Kowalkowski JA, Park W. Meta-Analysis of Cultural Influences in Trauma  
704 Exposure and PTSD Prevalence Rates. *Journal of Transcultural Nursing*. 2021;32(4):412-24. doi:  
705 10.1177/1043659621993909. PubMed PMID: 33593236.
- 706 63. Carpiello B. The Mental Health Costs of Armed Conflicts-A Review of Systematic Reviews  
707 Conducted on Refugees, Asylum-Seekers and People Living in War Zones. *Int J Environ Res Public Health*.  
708 2023;20(4). Epub 20230206. doi: 10.3390/ijerph20042840. PubMed PMID: 36833537; PubMed Central  
709 PMCID: PMC9957523.
- 710 64. Breslau N, Kessler RC, Chilcoat HD, Schultz LR, Davis GC, Andreski P. Trauma and posttraumatic  
711 stress disorder in the community: the 1996 Detroit Area Survey of Trauma. *Arch Gen Psychiatry*.  
712 1998;55(7):626-32. doi: 10.1001/archpsyc.55.7.626. PubMed PMID: 9672053.
- 713 65. Kessler RC, Sonnega A, Bromet E, Hughes M, Nelson CB. Posttraumatic stress disorder in the  
714 National Comorbidity Survey. *Arch Gen Psychiatry*. 1995;52(12):1048-60. doi:  
715 10.1001/archpsyc.1995.03950240066012. PubMed PMID: 7492257.
- 716 66. Keyes KM, Pratt C, Galea S, McLaughlin KA, Koenen KC, Shear MK. The burden of loss: unexpected  
717 death of a loved one and psychiatric disorders across the life course in a national study. *Am J Psychiatry*.  
718 2014;171(8):864-71. doi: 10.1176/appi.ajp.2014.13081132. PubMed PMID: 24832609; PubMed Central  
719 PMCID: PMC4119479.
- 720 67. Monk TH, Germain A, Reynolds CF. Sleep Disturbance in Bereavement. *Psychiatr Ann*.  
721 2008;38(10):671-5. doi: 10.3928/00485713-20081001-06. PubMed PMID: 20179790; PubMed Central  
722 PMCID: PMC2826218.
- 723 68. Kastrup MC. Mental health consequences of war: gender specific issues. *World Psychiatry*.  
724 2006;5(1):33-4. PubMed PMID: 16757990; PubMed Central PMCID: PMC1472268.
- 725 69. Chivers-Wilson KA. Sexual assault and posttraumatic stress disorder: a review of the biological,  
726 psychological and sociological factors and treatments. *Mcgill J Med*. 2006;9(2):111-8. PubMed PMID:  
727 18523613; PubMed Central PMCID: PMC2323517.
- 728 70. Tenaw LA, Aragie MW, Ayele AD, Kokeb T, Yimer NB. Medical and psychological consequences of  
729 rape among survivors during armed conflicts in northeast Ethiopia. *PLoS One*. 2022;17(12):e0278859.  
730 Epub 20221212. doi: 10.1371/journal.pone.0278859. PubMed PMID: 36508404; PubMed Central PMCID:  
731 PMC9744300.

732

## 733 **Supporting information**

734 S1 Questionnaire English: English version of questionnaire.

735 S2 Questionnaire Arabic: Arabic version of questionnaire.

736 S3 Table 1: Frequencies and percentages of exposure to events.

737 S4 Table2: Complete list of Members of the SudaMedReCollab study group.

738 S5 STROBE Checklist: STROBE Statement Checklist of cross-sectional studies
